# Supplementary material
Source: Research Square preprint supplement (doi:10.21203/rs.3.rs-8979207/v1)
Supplement: Supplementary file 1 [file fbc51773a10c49c3c3c576eb.docx]

**FIGURE 2B**

**
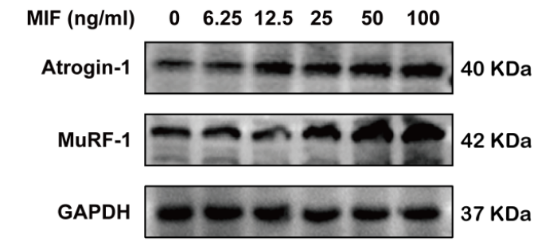
**


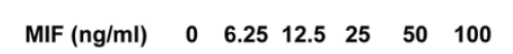


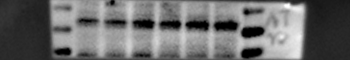

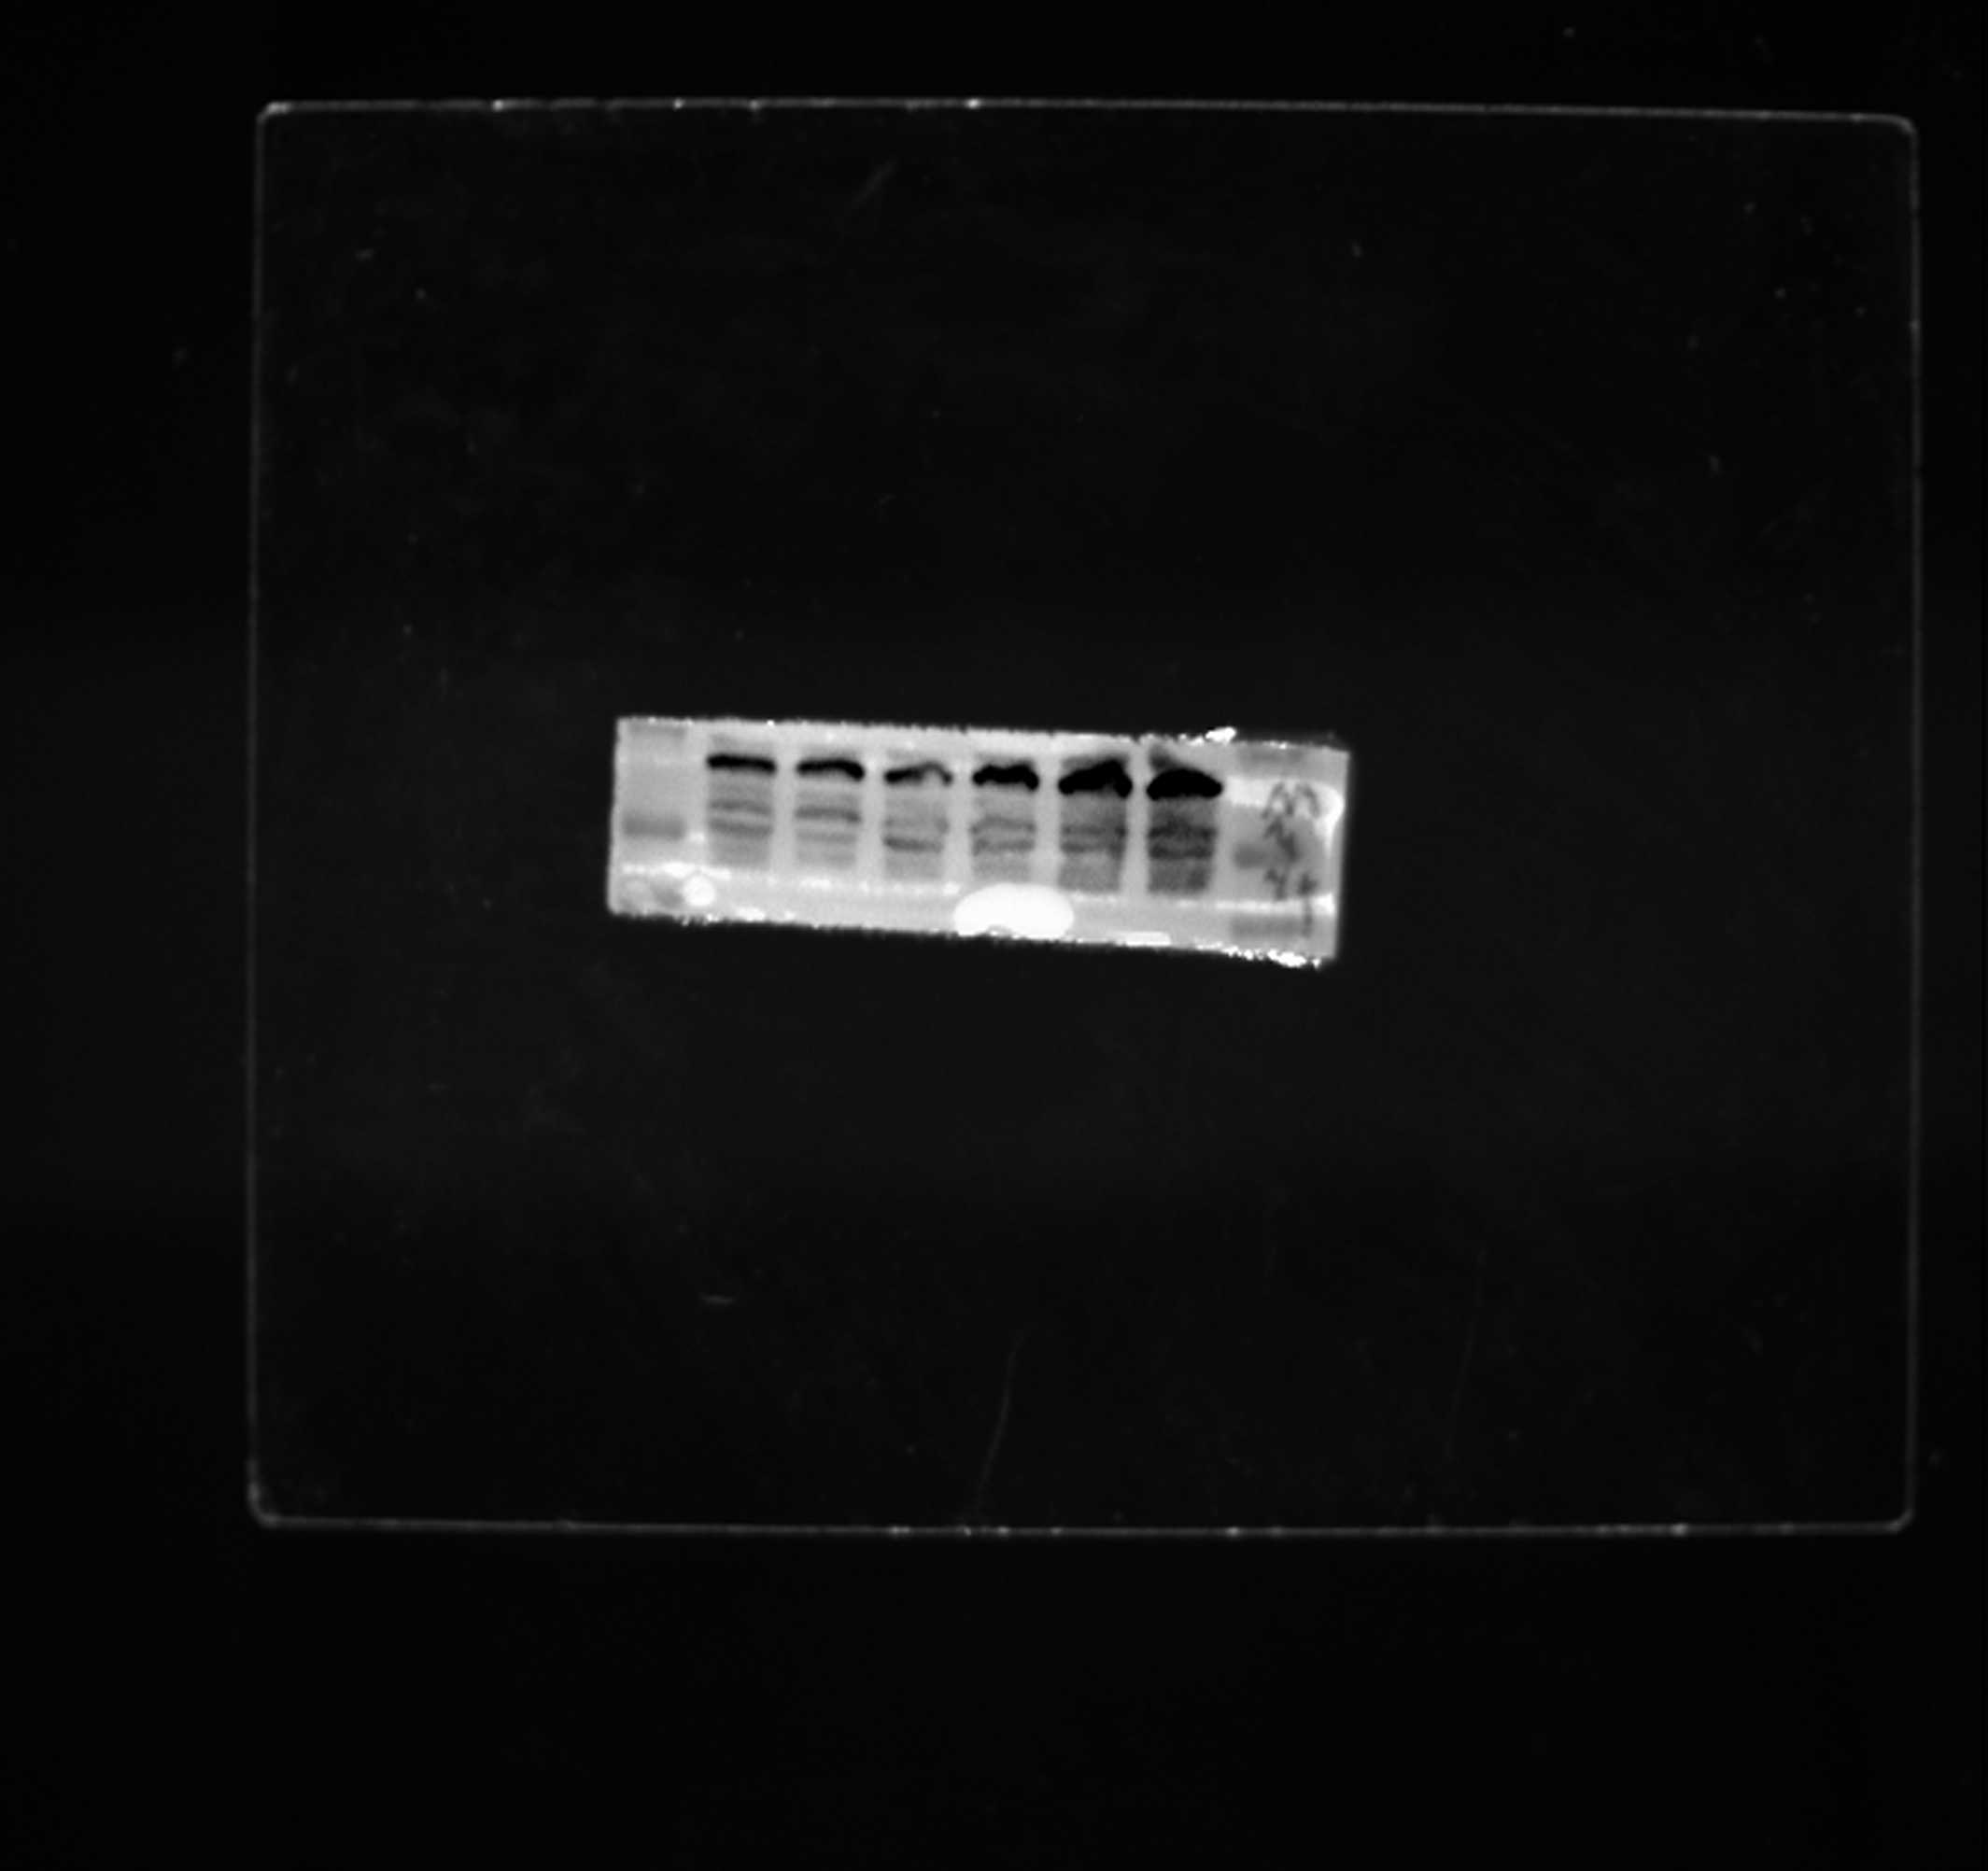

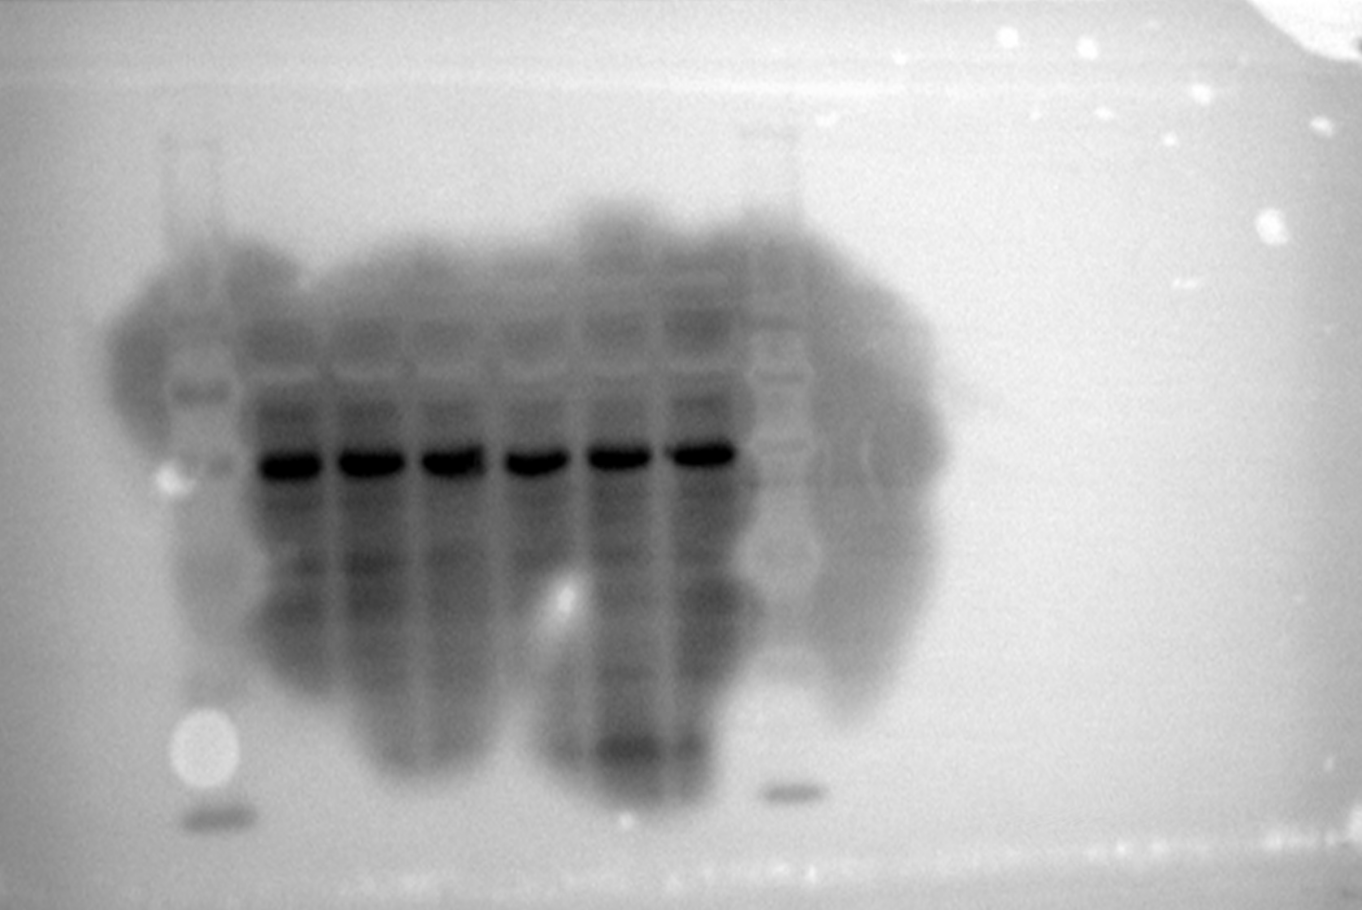


**50 KDa**

**40 KDa**

**Atrogin-1**

**35 KDa**

**50 KDa**

**MuRF-1**

**40 KDa**

**35 KDa**

**50 KDa**

**40 KDa**

**GAPDH**

**35 KDa**

**25 KDa**

**20 KDa**

**FIGURE 3C**


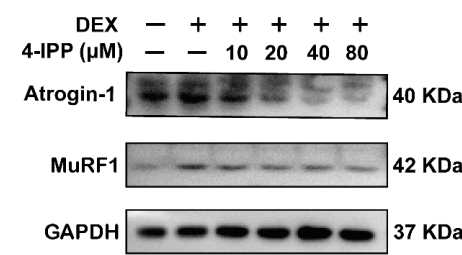


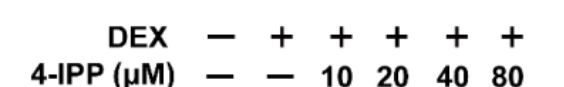


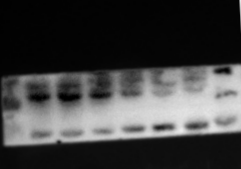


**50 KDa**

**40 KDa**

**Atrogin-1**

**35 KDa**


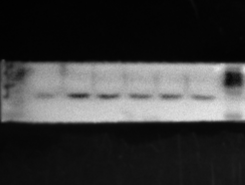


**50 KDa**

**MuRF-1**

**40 KDa**


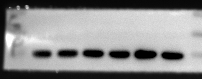


**50 KDa**

**40 KDa**

**GAPDH**

**35 KDa**

**FIGURE 4C**


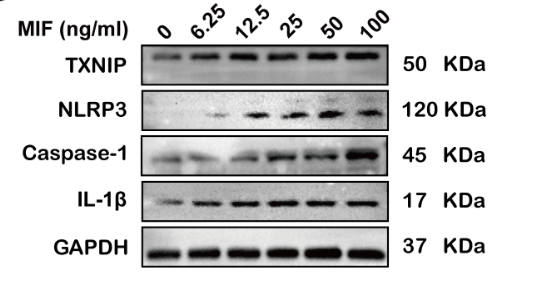


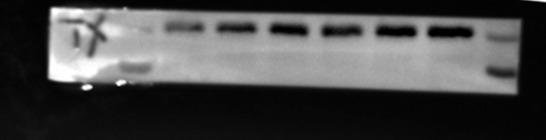

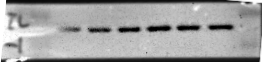

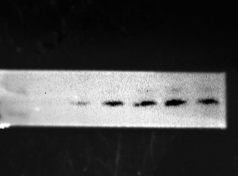

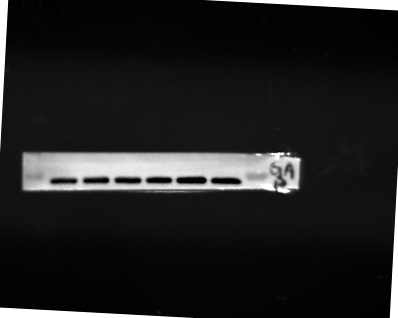

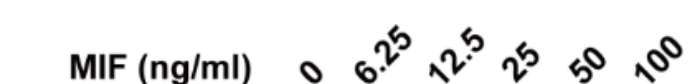


**TXNIP**

**50 KDa**

**40 KDa**

**150 KDa**

**NLRP3**

**100 KDa**


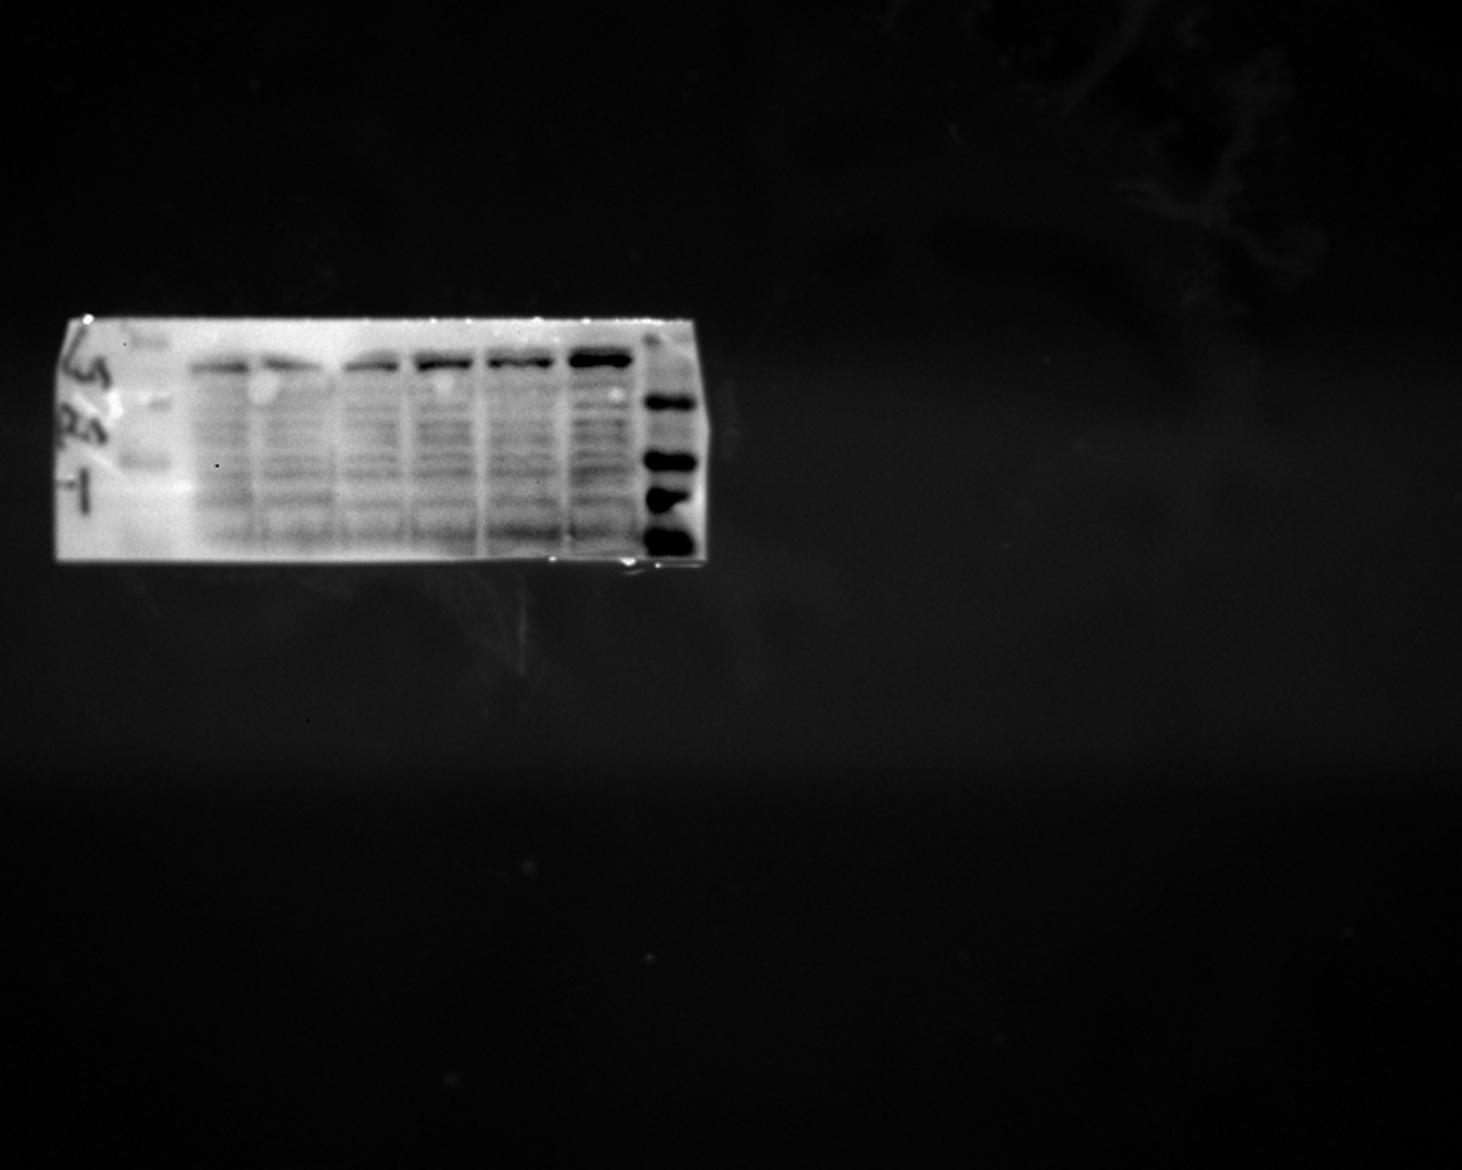


**50 KDa**

**40 KDa**

**Caspase-1**

**35 KDa**

**25 KDa**

**20 KDa**

**20 KDa**

**IL-1β**

**15 KDa**

**35 KDa**

**GAPDH**

FIGURE5C


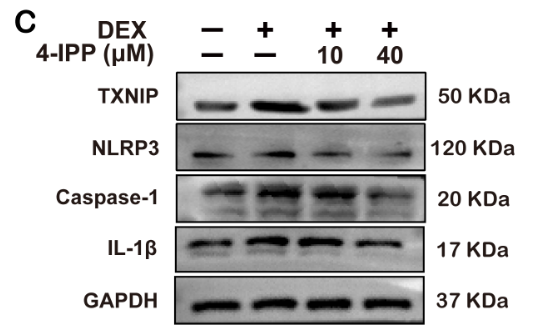


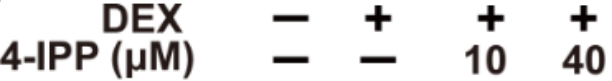

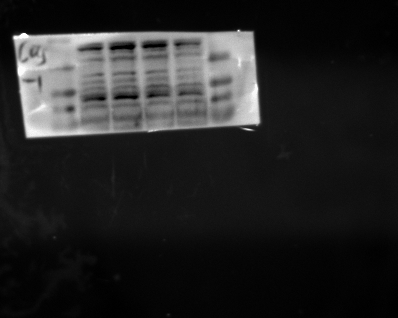

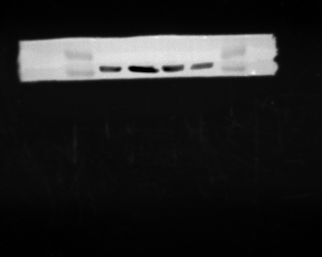

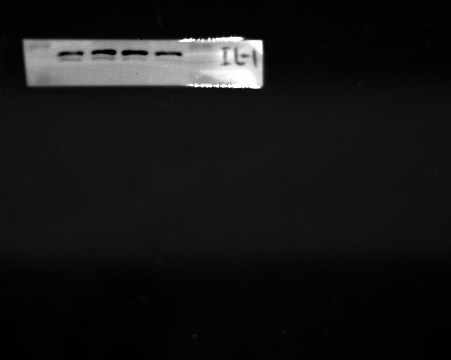

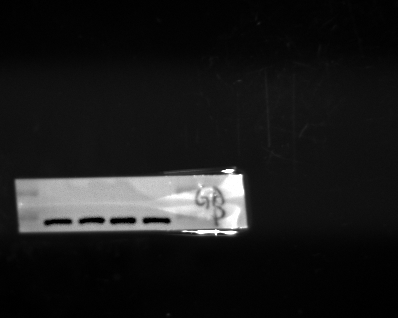

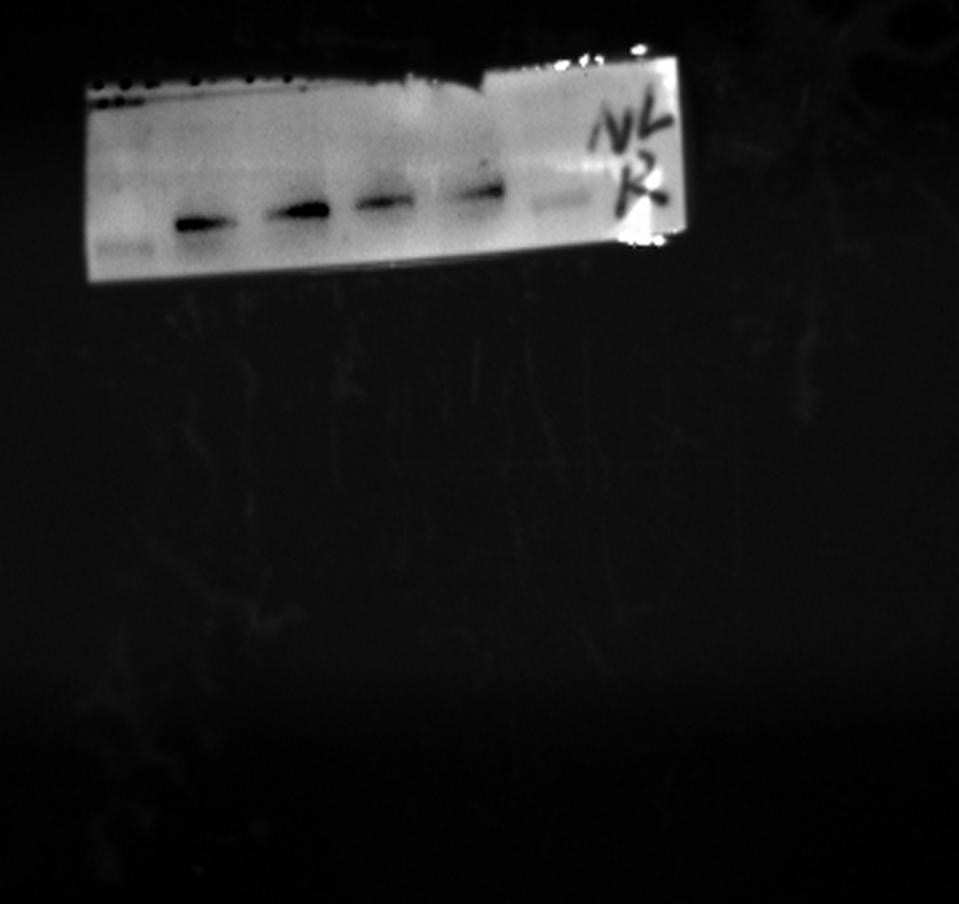


**IL-1β**

**Caspase-1**

**GAPDH**

**TXNIP**

**NLRP3**

**35 KDa**

**20 KDa**

**15 KDa**

**40 KDa**

**35 KDa**

**25 KDa**

**20 KDa**

**70KDa**

**100 KDa**

**150 KDa**

**50 KDa**
